# Supplementary material for: Uncertainties of SAI efficiency and impacts depending on the complexity of the aerosol microphysical model
Source: Copernicus journal article supplement (doi:10.5194/egusphere-2025-4274), 2025-09-15
Supplement: Supplementary file [file egusphere-2025-4274-AC1-supplement.pdf]

## Response to Reviewers

We thank both reviewers for their helpful comments and suggestions, which we address in detail below. As a general remark upfront, we updated three figures in the revised version of the manuscript: Figure 2, panels a and b, and Figures 3 and 4. In Figure 2, we plotted the global burden in TgSO<sub>2</sub>, but the title and figure caption showed TgS. Therefore, we correct the figure and now actually plot the burden in TgS. These changes do not affect the results or conclusions in the text. For Figures 3 and 4, we corrected a mistake in our plotting script for the modal aerosol model size distribution. The MAM4 size distribution, especially for H<sub>2</sub>SO<sub>4</sub> injections (Figure 4), aligns better with the CARMA model. However, the same shortcomings in the nucleation mode for SO<sub>2</sub> injections and in the coarse mode in MAM4 persist. Finally, we changed the caption in Figure A5 from “Surface Temperature” to “Temperature” and added a zonal mean comparison of water vapor to Appendix A8, following the comment by Reviewer 1.

### Reviewer 2

There's some very good work in this paper. There have been other studies looking at modal vs sectional microphysical models, and the models show different answers, so it's worth seeing what another model shows.

Most of my general comments stem from the fact that I was hoping to see direct comparison with other models, like the simulations from Laakso et al. It's very important to examine how different models differ in their aerosol microphysical uncertainties.

Yes, we agree that the comparisons with other studies are important. The paper includes a bit of a discussion on this already, and in the introduction, we outline the different studies that looked at similar experiments. We are comparing our results directly to those from Weisenstein. We cannot directly compare our results to the study by Laakso et al. (2022) since the experiments were not identical; however, we are comparing the conclusions of those studies with our results. To address the reviewers' comments, we adjusted this sentence:

Introduction:

Their [Laakso et al.,] study also discussed several different injection scenarios and amounts of injection; however, **since their scenarios differed substantially from those in Weisenstein et al. (2022) and our study, we cannot directly compare the results, but discuss similarities and general conclusions.**

The questions answered in the present work seem to be somewhat niche by comparison. I like the last science question posed in Section 1 (lines 64-65), but I don't really feel like it was answered.

We agree that we only briefly touched on the last question (What can we learn about the impacts beyond changes in radiative forcing of SAI?) and only included a few impacts beyond radiation, including lower tropical stratospheric heating and effects on ozone. This certainly needs to be considered in more detail in future studies. Here, since the study is rather idealized and uses fixed SSTs, it makes most sense to focus on atmospheric changes, such as stratospheric transport and ozone. To address the comment, we add in the conclusions: **“The difference in the results highlights a significant uncertainty in the SAI response to surface climate, not only across different injection strategies but also across different aerosol models. To**

**investigate the full effects of these differences on climate, future studies using an Earth System model with a fully coupled ocean are required. “**

For instance, I struggled with the novelty of looking at point vs regional injections (see, for example, English et al., 2012 or Niemeier et al., 2013). Figure 1 illustrates this point quite well, in that the aerosol burden increases where the aerosols are injected for both MAM and CARMA, which one could have hypothesized prior to doing any simulations. CARMA shows a systematic low bias (or MAM shows a systematic high bias – it’s hard to say which), but you didn’t need to spread out the injection to learn that. I think the purpose of looking at this particular aspect needs to be better justified, especially with regard to what fundamental uncertainties this study is aiming to solve.

The reviewer is correct that the experimental design is not novel (which we don’t claim), however, the conclusions from comparing two aerosol models are. We have repeated the same experiment as shown in Weisenstein et al. (2022) to address whether differences between the models are due to aerosol microphysics or other factors, including model resolution, physics, and transport representations. Here, we show that significant differences, similar to the inter-model spread reported in Weisenstein et al. (2022), can arise within the same Earth System model due to the use of different aerosol microphysical schemes. We think that our comparison of all the experiments shown in Weisenstein et al. (2022) is valuable, since it identified main differences between the two microphysical models, e.g., the burden per injection for CARMA is lower for regional injections and higher for MAM4 for point injections, which is of high relevance considering the injection strategies usually used in model simulations of CESM2(WACCM6) using MAM4. This shows that using different microphysicals can greatly affect the outcomes of different injection strategies. Furthermore, the Weisenstein et al. (2022) protocol was proposed as a GeoMIP testbed experiment, which we followed here. Without all the experiments, we could not have provided a full analysis as we did.

Studying the microphysics of accumulation mode aerosols are fine from a purely scientific standpoint, although given the highly questionable feasibility of this method, I would hope for a better tie-in. That is, how can we use accumulation mode injection to learn about microphysics and stratospheric processes more generally? (See my point above about the science questions.) If the only justification is that it’s a proposed type of aerosol, then I put it on par with studying diamond aerosol injection – interesting but ultimately just a modeling exercise. Lines 180-189 provide a good illustration of what I’m talking about. These lines basically said that some people proposed an idea, and that’s it. You could have rephrased this to be more scientifically interesting – in the previous section, you found that the nucleation stage is critical, and AM-H<sub>2</sub>SO<sub>4</sub> allows you to isolate nucleation from coagulation growth, allowing you to further narrow which processes contribute to uncertainties.

We agree, from the process level understanding, accumulation model injections are indeed helpful to remove the effects of nucleation differences, as already discussed in the text. The use of AM particle injections has been motivated in Weisenstein et al. (2022) and other previous studies. Here, we have repeated the study to reproduce it with a different aerosol microphysical model.

All of that said, the study does add to the knowledge base in general, and the study is done well. I don’t see any faults in the analysis.

Specific comments:

Line 23: I don't understand what this means. Just write it out please.

We rewrote the sentence to: "Multi-model comparisons reveal differences in cooling efficiency, ranging from 0.4 to 1.3°C for 10 TgSO<sub>2</sub>/yr injection (Haywood and Tilmes, 2022), or likewise, **the required injections to reduce global surface temperature by 1°C, range between 8 and 16 TgSO<sub>2</sub>/yr, with reasons for these differences still to be understood.**

Line 60: Why did you use a fixed QBO?

The model version with 2-degree horizontal resolution and 70 vertical levels cannot resolve a realistic QBO (also discussed in Davis et al., 2022).

Lines 92ff: The experimental setup seems strange. Why do you need 30-year simulations with fixed SSTs? I suppose there's nothing wrong with doing extra, but it seems like overkill.

We require a 10-year spin-up of the baseline simulation because the model has to adjust to the specific conditions with GHGs adjusted to the year 2040 and SSTs fixed at the present day. Furthermore, a robust change in ozone requires a longer period to be assessed.

Lines 147-156: Is there anything particularly surprising in these results? Surely this parallels results that others have found.

Yes, this is indeed surprising, and parallel results have not been found in other studies. We add a sentence to clarify the importance of the result: "**These findings show that the specifics of aerosol microphysical schemes can lead to opposing conclusions about whether point or regional injections result in larger sulfate aerosol burdens, which could influence decision-making about which injection scenario is preferred.**"

Lines 175-178: I wanted to see more about this. This is the really interesting stuff.

We think that this part really supports the fact that sectional aerosol models behave similarly to each other when it comes to new particle formation.

Line 190: Well, yes, because you put more injection in the tropics, so of course you're going to see more aerosol there.

The point of this part is that the size of aerosol particles strongly depends on the number density of particles injected into a point. So, we see larger aerosols for point injections than for regional injections. To clarify, we change the sentence to: **In contrast to SO<sub>2</sub> injections, point injections at 30N and 30S inject a higher number density of particles at the injection location, leading to more initial coagulation than regional injections (Benduhn et al., 2016). This results in a somewhat smaller effective radius for regional than for point injections for both MAM4 and CARMA (Figure 2c).**

Lines 206-208: This is written as though it's surprising, but essentially these models are doing what they're designed to do.

Here, again, MAM4 is behaving very differently from CARMA. Later, we explain this by comparing the size distributions, and clearly, the behavior in MAM4 does not do what it is supposed to: the coarse model peak is not growing sufficiently in size.

Lines 222-223: I found this sentence really frustrating. It's written like a throwaway, but this is exactly the sort of thing that needs to be investigated further.

Based on the comment, we decided to add a little bit more explanation here. **“This indicates that differences in how the sigma range and size constraint of the modes in modal models are defined can lead to a significantly different aerosol burden for continuous sulfur injections.”**
